# Supplementary material for: Angiogenesis precedes myogenesis during regeneration following biopsy injury of skeletal muscle
Source: PubMed Central journal article supplement (PMC9926536; doi:10.1186/s13395-023-00313-3), 2023-02-14

# Supp Fig 2

**A**

10 dpi

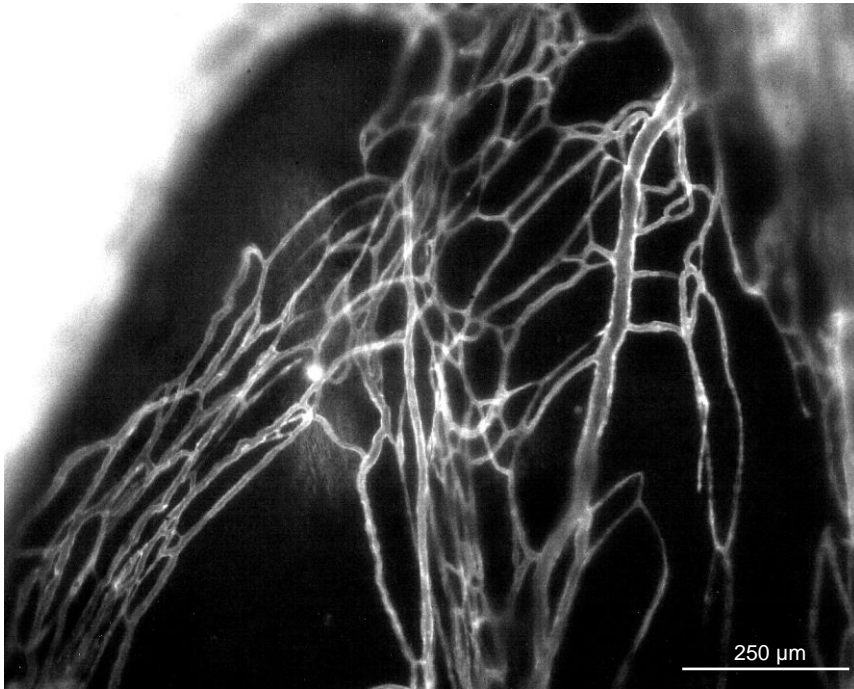

**B**

10 dpi

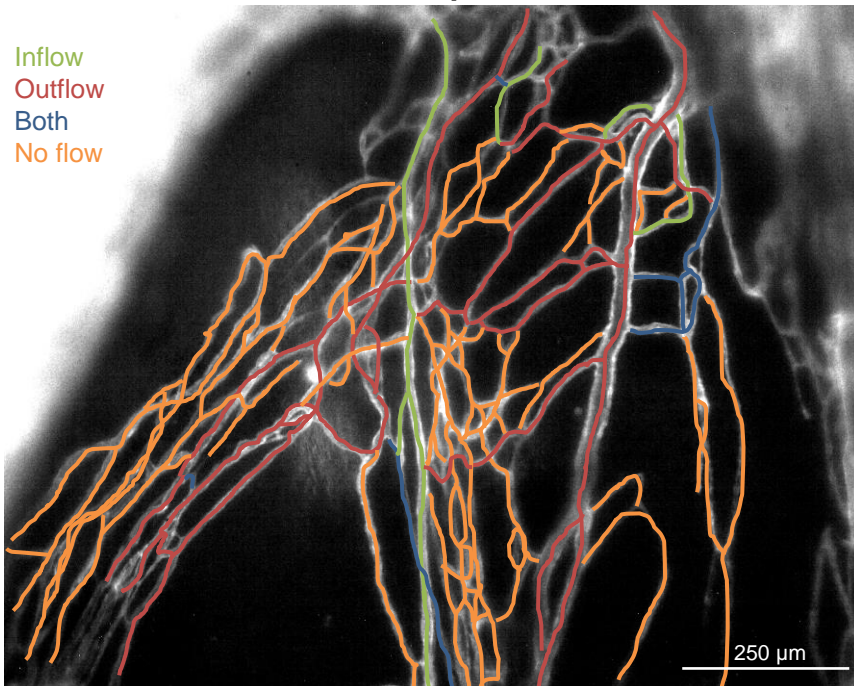

Supplement: 13395_2023_313_MOESM2_ESM.pdf [file 13395_2023_313_MOESM2_ESM.pdf]
